# Supplementary material
Source: PubMed Central journal article supplement (PMC3281722)
Supplement: supp_M111.282350_jbc.M111.282350-2.pdf [file supp_M111.282350_jbc.M111.282350-2.pdf]

**Supplemental Table I:** List of primers used for cloning: 1-6: primers used for cloning of the bait construct, 7-12: primers used for cloning of the pMX-flag-TLR4-IRES-GFP vector, 13-16: primers used for cloning of the pE-CMV-TLR4 vector, 17-78: primers used for mutagenesis of the TLR4 TIR domain, 79-80: primers used for cloning of the flag-tagged TRAM vector.

| Number | Construct                                                                                                           | Primers                                                          |
|--------|---------------------------------------------------------------------------------------------------------------------|------------------------------------------------------------------|
| 1      | TLR4ic prey from pCLL                                                                                               | 5'-GCGAATTCTGCATAAAGTATGGTAGAGG-3'                               |
| 2      | TLR4ic prey from pCLL                                                                                               | 5'-CGCTGCGGCCGCTCAGATAGATGTTGC-3'                                |
| 3      | TLR4ic from pCLL into pCLG                                                                                          | 5'-GCGGATCCTGCATAAAGTATGGTA-3'                                   |
| 4      | TLR4ic from pCLL into pCLG                                                                                          | 5'-GCGCGGCCGCTCAGATAGATGTTGC-3'                                  |
| 5      | From pCLG to pMX:<br>insertion AgeI                                                                                 | 5'-GTGGGTGGTGCACGAGCTCCACCGTTGCATAAAGTATGGTAG-3'                 |
| 6      | From pCLG to pMX:<br>insertion AgeI                                                                                 | 5'-CTACCATACTTTATGCAACCGGTGGAGCTCGTCGACCCACCCAC-3'               |
| 7      | pMX-flag-TLR4-IRES-GFP:<br>deletion NgoMIV                                                                          | 5'-CACCTAGATCCTTTTGCACCGCCGCAAATCAATC-3'                         |
| 8      | pMX-flag-TLR4-IRES-GFP:<br>deletion NgoMIV                                                                          | 5'-GATTGATTTGCGCCGGTGCAAAAGGATCTAGGTG-3'                         |
| 9      | pMX-flag-TLR4-IRES-GFP:<br>insertion StuI-XhoI                                                                      | 5'-GATCCGGCAGGCCTCGTGCTGACCTACTCTCGAGGC-3'                       |
| 10     | pMX-flag-TLR4-IRES-GFP:<br>insertion StuI-XhoI                                                                      | 5'-GGCCGCCTCGAGAGTAGGTGACGACGAGGCCTGCCG-3'                       |
| 11     | pMX-flag-TLR4-IRES-GFP:<br>insertion NgoMIV                                                                         | 5'-CACCTGATGCTTCTTCCCGGCTGCATAAAGTATGG-3'                        |
| 12     | pMX-flag-TLR4-IRES-GFP:<br>insertion NgoMIV                                                                         | 5'-CCATACTTTATGCAGCCGGCAAGAAGCATCAGGTG-3'                        |
| 13     | pE-CMV-TLR4<br>from pFlag CMV1 – TLR4 vector<br>(gift from Dr. O'Neill):<br>mutagenese primer<br>insertion of SacII | 5'-CTGCAGTTGCTGACTACCGCGCGATGACGACAAGCTTG-3'                     |
| 14     | pE-CMV-TLR4<br>mutagenese primer                                                                                    | 5'-CAAGCTTGTCGTCATCGCCGGTAGTCAGCAACTGCAG-3'                      |
| 15     | pE-CMV-TLR4<br>from pFlag CMV1 – TLR4 vector<br>(gift from Dr. O'Neill):<br>annealing primer E-tag                  | 5'-GGTAGTGCGCCGGTCCGTATCCGGACCCGCTGGAACCGCTGCGGCCGGAATTCAT -3'   |
| 16     | pE-CMV-TLR4:<br>annealing primer E-tag                                                                              | 5'-CGATGAATTCGCGCCGCACGCGTTCCAGCGGTCGGATACGGCACCGGCGCATACCCGC-3' |
| 17     | TLR4ic R731A                                                                                                        | 5'-GGTTTCCATAAAGCGCAAAGGTGATTGTTGTGGTGTCCC-3'                    |
| 18     | TLR4ic R731A                                                                                                        | 5'-GGGACACCACAACAATCACCTTTGCGCTTTTATGGAAACC-3'                   |
| 19     | TLR4ic Y674A                                                                                                        | 5'-GGTAGAGGTGAAAACATCGCGGATGCATTTGTTATCTACTCAAGCC-3'             |
| 20     | TLR4ic Y674A                                                                                                        | 5'-GGCTTGAGTAGATAACAAATGCATCCGCGATGTTTTCACTCTACC-3'              |
| 21     | TLR4ic E698A                                                                                                        | 5'-GCTAGTAAAGAATTTAGAAGCAGGTGTGCTCCATTTCAGC-3'                   |
| 22     | TLR4ic E698A                                                                                                        | 5'-GCTGAAATGGAGGCACACCTGCTTCTAAATCTTTACTAGC-3'                   |
| 23     | TLR4ic Q704A                                                                                                        | Purchased from GENEART                                           |
| 24     | TLR4ic R710A                                                                                                        | 5'-GCTCTGCCTTCACTACGCCACTTTATTCCCGG-3'                           |
| 25     | TLR4ic R710A                                                                                                        | 5'-CCGGGAATAAAGTCGGCGTAGTGAAGGCAGAGC-3'                          |
| 26     | TLR4ic D711A                                                                                                        | 5'-GCCTTCACTACAGAGCATTCATCCCGGTGTGGCC-3'                         |
| 27     | TLR4ic D711A                                                                                                        | 5'-GGCCACACCGGGAATGAATGCTCTGTAGTGAAGGC-3'                        |
| 28     | TLR4ic RD711-2AA                                                                                                    | 5'-CAGCTCTGCCTTCACTACGCCCATTCATCCCGGTGTGGCC-3'                   |
| 29     | TLR4ic RD711-2AA                                                                                                    | 5'-GGCCACACCGGGAATGAATGCGGCGTAGTGAAGGCAGAGCTG-3'                 |
| 30     | TLR4ic Poc                                                                                                          | 5'-GGACTGGTAAGGAATGAGCTCAATAAGAATTTAGAAGAAGGGGTGCC-3'            |

|    |                    |                                                           |
|----|--------------------|-----------------------------------------------------------|
| 31 | TLR4ic Poc         | 5'-GGCACCCCTTCTCTAAATTCTTATTGAGCTATTCTTACCCAGTCC-3'       |
| 32 | TLR4ic P714H       | 5'-CCTTACTACAGAGACTTTATCCATGGTGTGGCCATTGCTGCC-3'          |
| 33 | TLR4ic P714H       | 5'-GGCAGCAATGGCCACACCATGGATAAAGTCTCTGTAGTGAAGG-3'         |
| 34 | TLR4ic S744A       | 5'-GCACTTCATCCAGGCGCGCTGGTGTATCTTTGAATATG-3'              |
| 35 | TLR4ic S744A       | 5'-CATATTCAAAGATACACCAGCGCGCTGGATGAAGTGC-3'               |
| 36 | TLR4ic R745A       | 5'-GCACTTCATCCAGAGCGCTTGGTGTATCTTTGAATATGAG-3'            |
| 37 | TLR4ic R745A       | 5'-CTCATATTCAAAGATACACCAAGCGCTCTGGATGAAGTGC-3'            |
| 38 | TLR4ic C747S       | 5'-GCACTTCATCCAGAGCCGCTGGTCAATATTTGAATATGAGATTGC-3'       |
| 39 | TLR4ic C747S       | 5'-GCAATCTCATATTCAAATATTGACCAGCGGCTCTGGATGAAGTGC-3'       |
| 40 | TLR4ic C747A       | 5'-CCAGAGCCGCTGGGCAATATTTGAATATGAGATTGC-3'                |
| 41 | TLR4ic C747A       | 5'-GCAATCTCATATTCAAATATTGCCAGCGGCTCTGG-3'                 |
| 42 | TLR4ic Y751A       | 5'-GGTGTATCTTTGAAGCTGAGATTGCTCAGACCTG-3'                  |
| 43 | TLR4ic Y751A       | 5'-CAGGTCTGAGCAATCTCAGCTTCAAAGATACACC-3'                  |
| 44 | TLR4ic E752A       | 5'-GGTGTATCTTTGAATATGCAATTGCTCAGACCTGGC-3'                |
| 45 | TLR4ic E752A       | 5'-GCCAGGTCTGAGCAATTGCATATTCAAAGATACACC-3'                |
| 46 | TLR4ic YE751-2AA   | 5'-GGTGTATCTTTGAAGCTGCAATTGCTCAGACCTGGC-3'                |
| 47 | TLR4ic YE751-2AA   | 5'-GCCAGGTCTGAGCAATTGCAGCTTCAAAGATACACC-3'                |
| 48 | TLR4ic EK775-6AS   | 5'-GTCCTGCAGAAGGTGGCGTCGACCCTGCTCAGGCAG-3'                |
| 49 | TLR4ic EK775-6AS   | 5'-CTGCCTGAGCAGGGTCGACGCCACCTTCTGCAGGAC-3'                |
| 50 | TLR4ic Q781A       | 5'-GAAGACCCTGCTCAGGGCCCAGGTGGAGCTGTACCG-3'                |
| 51 | TLR4ic Q781A       | 5'-CGGTACAGCTCCACCTGGGCCCTGAGCAGGGTCTTC-3'                |
| 52 | TLR4ic N792A       | Purchased from GENEART                                    |
| 53 | TLR4ic E796A       | 5'-CCGCCTTCTCAGCAGGAATACGTACTGGCCTGGGAGGACAGTGTCC-3'      |
| 54 | TLR4ic E796A       | 5'-GGAACTGTCTCCAGGCCAGGTACGTATTCCTGCTGAGAAGGCGG-3'        |
| 55 | TLR4ic EWE796-8AWA | 5'-GGAACACTTACCTGGCATGGCGGATAGTGTCTGGGGCGGCAC-3'          |
| 56 | TLR4ic EWE796-8AWA | 5'-GTGCCGCCCCAGGACACTATCCGCCATGCCAGGTAAGTGTTC-3'          |
| 57 | TLR4ic E798A       | Purchased from GENEART                                    |
| 58 | TLR4ic Y794F       | 5'-GCAGGAACACTTTTCTCGAGTGGGAGGACAGTGTCC-3'                |
| 59 | TLR4ic Y794F       | 5'-GGAACTGTCTCCACTCGAGAAAAGTGTTCCTGC-3'                   |
| 60 | TLR4ic Y794A       | 5'-CCTTCTCAGCAGGAACACTGCACTGGAGTGGGAGG-3'                 |
| 61 | TLR4ic Y794A       | 5'-CCTCCACTCCAGTGCAGTGTTCCTGCTGAGAAGG-3'                  |
| 62 | TLR4ic R810S       | Purchased from GENEART                                    |
| 63 | TLR4ic K813A       | 5'-CTGGAGACGACTCAGATCTGCCCTGCTGGATGGTAAATCATGG-3'         |
| 64 | TLR4ic K813A       | 5'-CCATGATTTACCATCCAGCAGGGCAGATCTGAGTCGTCCAG-3'           |
| 65 | TLR4ic C706L       | 5'-GAATTTAGAAGAAGGGGTACCTCCATTTAGCTCCTCTTCACTACAGAGAC-3'  |
| 66 | TLR4ic C706L       | 5'-GTCTCTGTAGTGAAGGAGGAGCTGAAATGGAGGTACCCCTTCTTCAAATTC-3' |
| 67 | TLR4ic C706A       | 5'-GAATTTAGAAGAAGGGGTACCTCCATTTAGCTCGCCCTTCACTACAGAGAC-3' |
| 68 | TLR4ic C706A       | 5'-GTCTCTGTAGTGAAGGGGAGCTGAAATGGAGGTACCCCTTCTTCAAATTC-3'  |
| 69 | TLR4ic Q755A       | 5'-CTTTGAATATGAGATTGCTGCCACGTGGCAGTTTCTGAGCAG-3'          |
| 70 | TLR4ic Q755A       | 5'-CTGCTCAGAACTGCCACGTGGCAGCAATCTCATATTCAAAG-3'           |
| 71 | TLR4ic W757A       | 5'-GAGATTGCTCAGACCGCCAGTTTCTGAGCAGTCGTGC-3'               |
| 72 | TLR4ic W757A       | 5'-GCACGACTGCTCAGAACTGGGCGGTCTGAGCAATCTC-3'               |
| 73 | TLR4ic QTW757-9AAA | 5'-GGTGTATCTTTGAATATGAGATTGCTGCAGCAGCCAGTTTCTGAGCAGTCG-3' |
| 74 | TLR4ic QTW757-9AAA | 5'-CGACTGCTCAGAACTGGGCTGCTGCAGCAATCTCATATTCAAAGATACACC-3' |
| 75 | TLR4ic C831A       | 5'-GAAGGAACAGTGGGTACCGGAGCCAATTGGCAGGAAGCAAC-3'           |

|    |                   |                                                                         |
|----|-------------------|-------------------------------------------------------------------------|
| 76 | TLR4ic C831A      | 5'-GTTGCTTCTGCCAATTGGCTCCGGTACCCACTGTTCTTC-3'                           |
| 77 | TLR4ic C831STOP   | 5'-GAAGGAACAGTGGGTACCGGATGAAATTGGCAGGAAGCAAC-3'                         |
| 78 | TLR4ic C831STOP   | 5'-GTTGCTTCTGCCAATTCATCCGGTACCCACTGTTCTTC-3'                            |
| 79 | Cloning flag-TRAM | GCGGTAACCGCCCATGGATTACAAGGATGACGACGATAAGGGTATCGGGAAGTCTAAAATAAAT<br>TCC |
| 80 | Cloning flag-TRAM | GCCTCGAGTCAGGCAATAAATTGTCTTTGTACC                                       |
