# Supplementary material
Source: PubMed Central journal article supplement (PMC3281722)

Supplement Figure 1

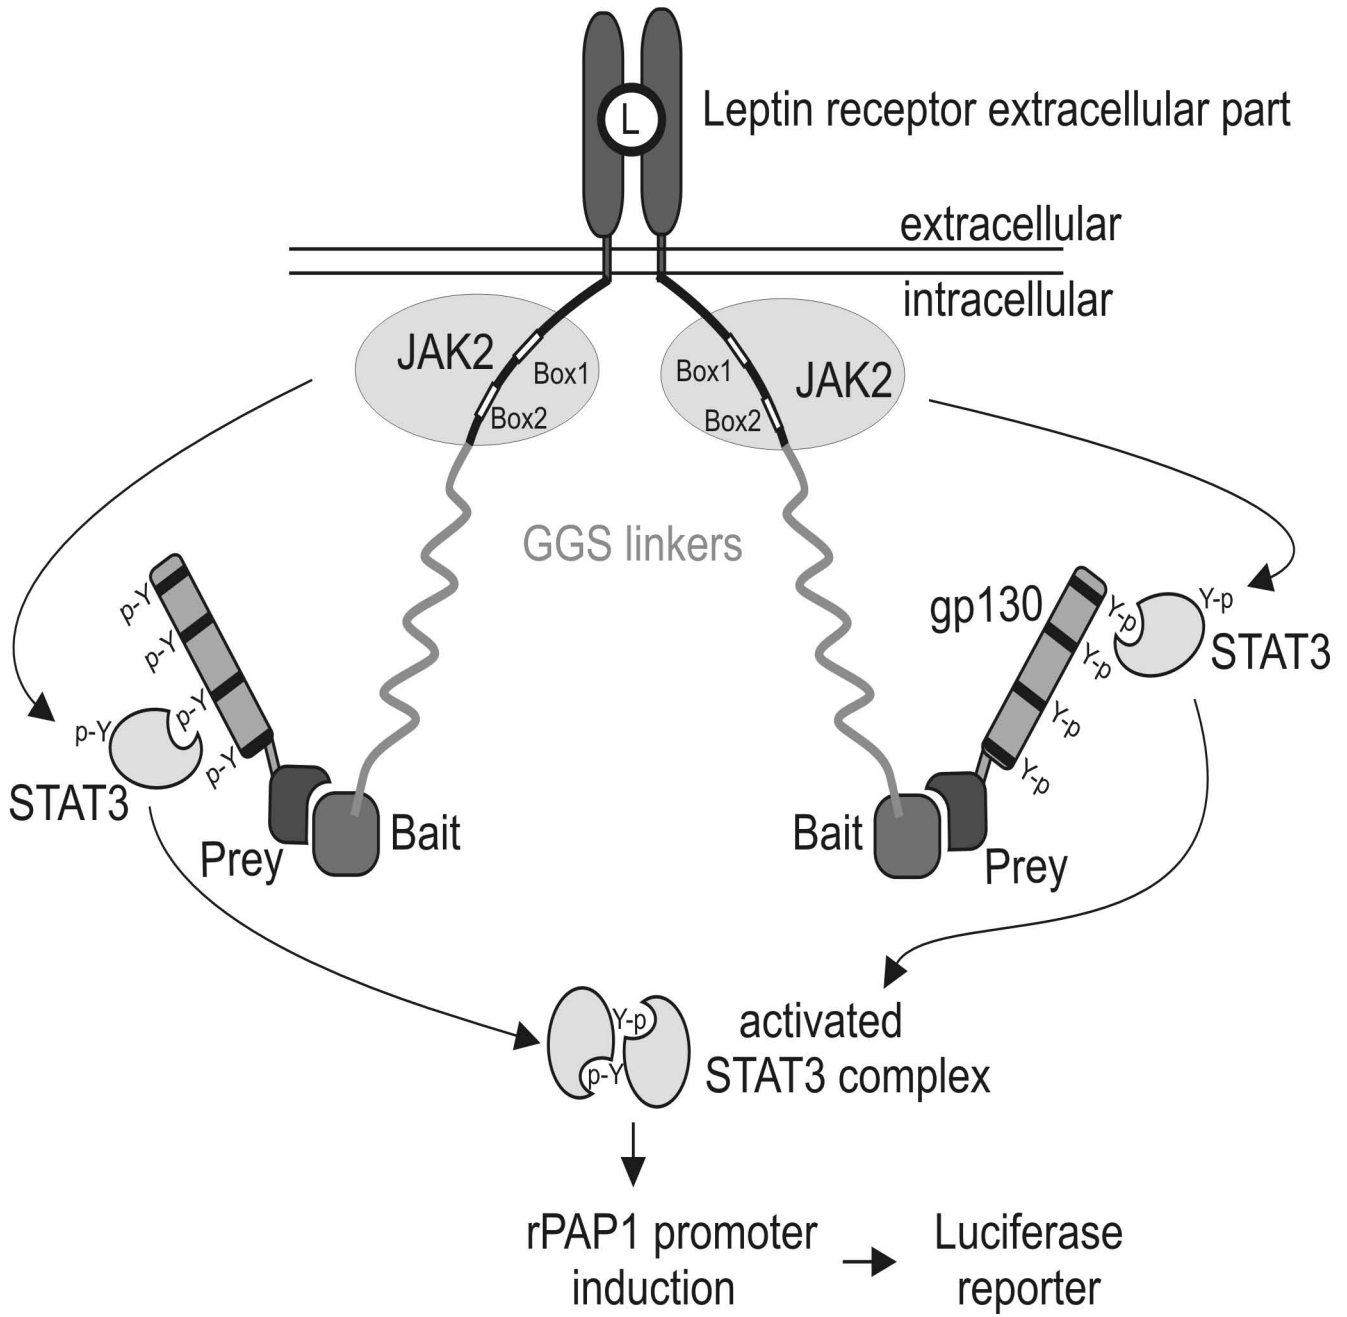

Supplement: supp_M111.282350_jbc.M111.282350-1.pdf [file supp_M111.282350_jbc.M111.282350-1.pdf]
